# Supplementary material for: The Association between Vitamin D and Gut Microbiota: A Systematic Review of Human Studies
Source: MDPI journal article supplement (doi:10.3390/nu13103378), 2021-09-26
Supplement: s1 [file s1]

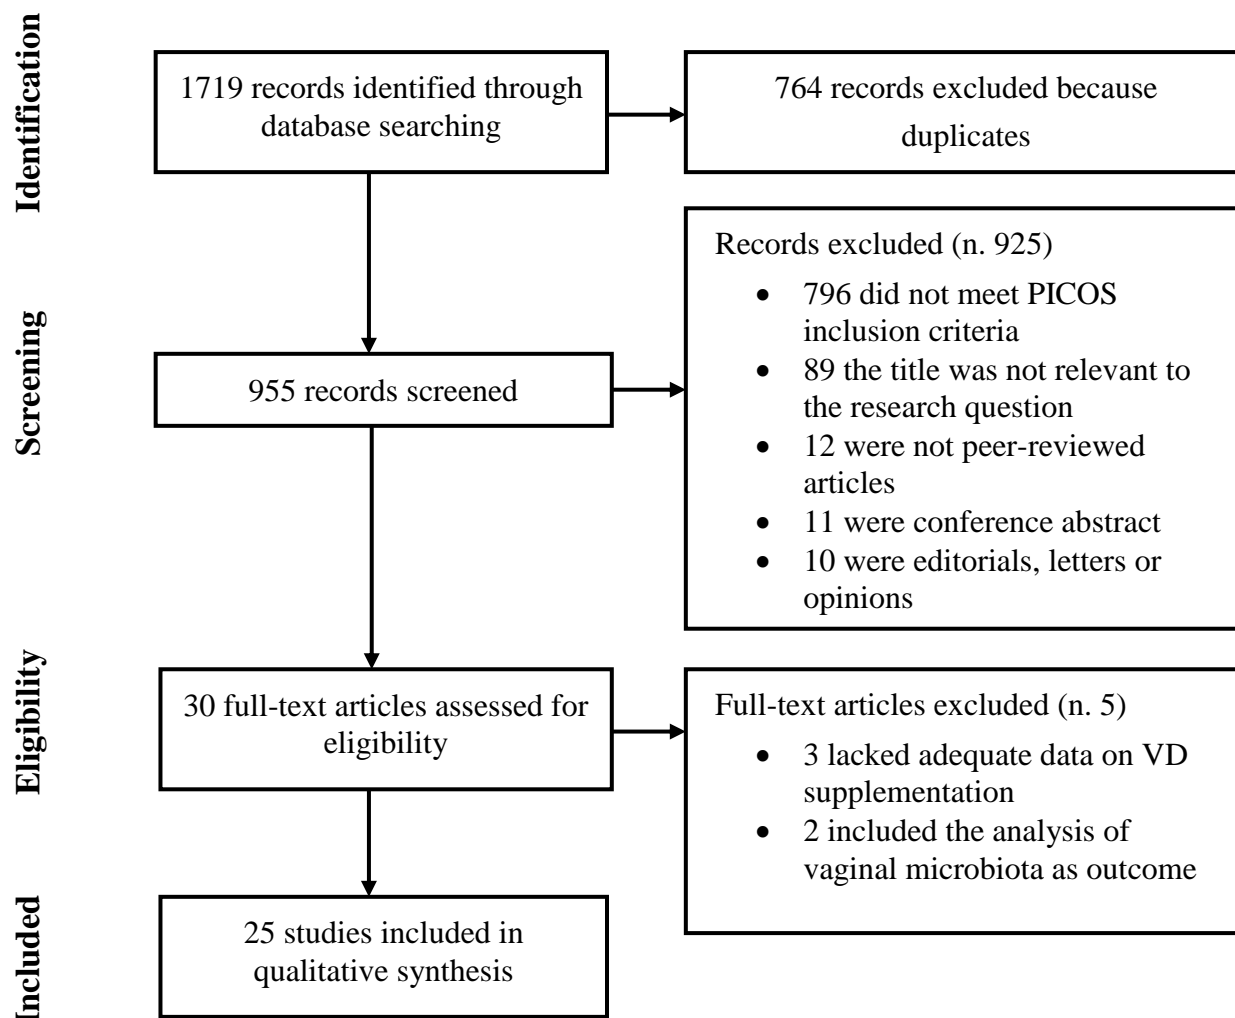

**Figure S1:** Flowchart of study selection

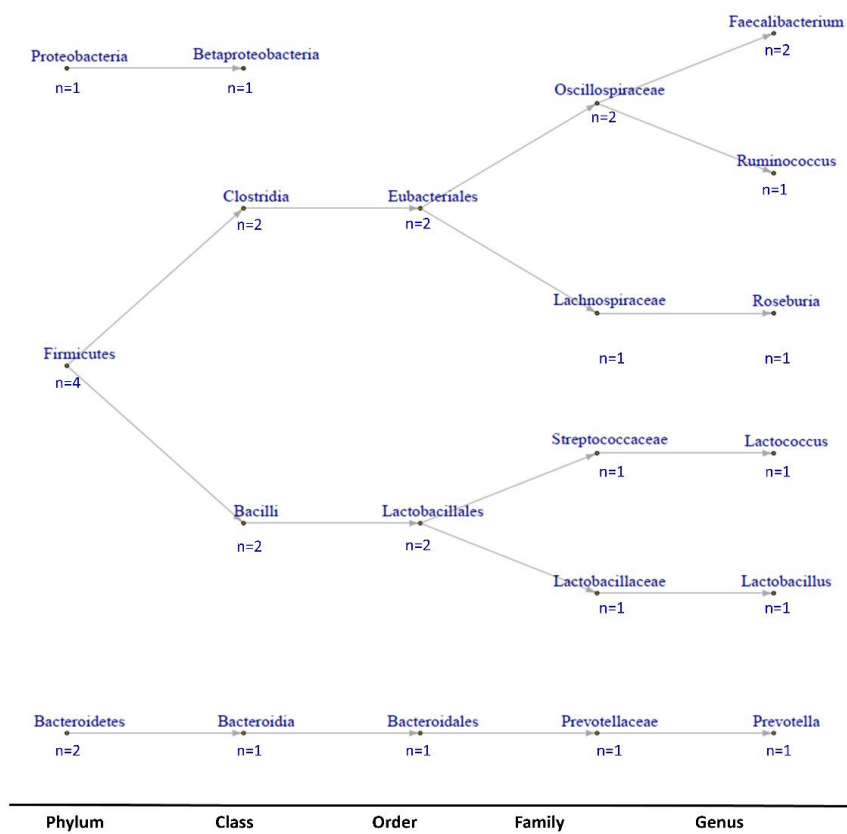

**Figure S2.** Phylogenetic tree of taxa that significantly decreased after vitamin D supplementation (supplementation group).

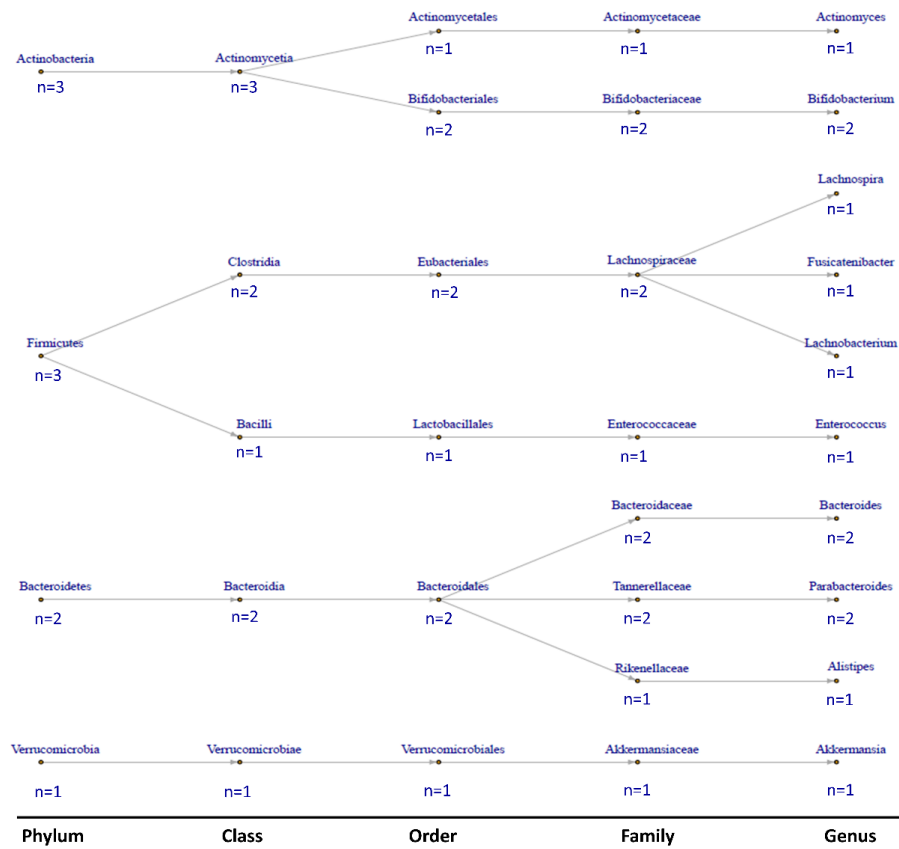

**Figure S3.** Phylogenetic tree of taxa that significantly increased after vitamin D supplementation (supplementation group).

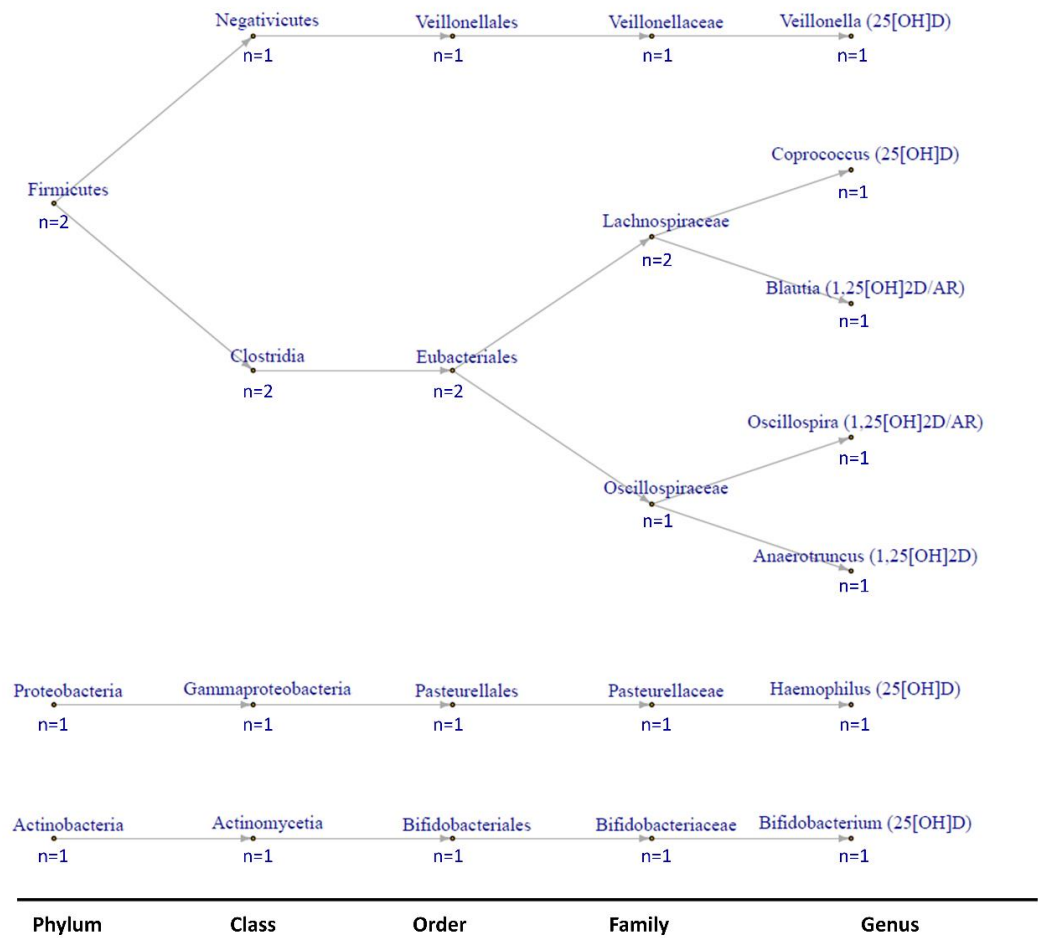

**Figure S4.** Phylogenetic tree of taxa that were significantly and negatively associated with either vitamin D serum concentrations or intake (non-supplementation group).

AR = Activation ratio of vitamin D, defined as 1,25(OH)2D/25(OH)D; 25(OH)D = 25 hydroxyvitamin D; 1,25(OH)2D = 1,25 hydroxyvitamin D2.



**Table S1. Phylogenetic reconstruction of taxa that significantly decreased after vitamin D supplementation (Supplementation group)**

| Author, PY        | Health Status       | Sample     | Stratification                                                  | Phylum           | Class               | Order            | Family                | Genus                      | Species              |
|-------------------|---------------------|------------|-----------------------------------------------------------------|------------------|---------------------|------------------|-----------------------|----------------------------|----------------------|
| Bashir, 2016      | Healthy             | Biopsy     | Upper GI: GC (n paired = 13)                                    | Proteobacteria   | Gammaproteobacteria | Enterobacterales | Enterobacteriaceae    | NA                         | Escherichia/Shigella |
|                   |                     |            |                                                                 | Proteobacteria   | Gammaproteobacteria | Pseudomonadales  | Pseudomonadaceae      | Pseudomonas                |                      |
|                   |                     |            |                                                                 | Firmicutes       | Bacilli             | Lactobacillales  | Streptococcaceae      | Lactococcus                |                      |
|                   |                     |            |                                                                 | Proteobacteria   | Betaproteobacteria  | Burkholderiales  | Comamonadaceae        | Variovorax                 |                      |
|                   |                     |            |                                                                 | Proteobacteria   | Gammaproteobacteria | Enterobacterales | Enterobacteriaceae    | Enterobacteriaceae unclass |                      |
|                   |                     |            |                                                                 | Proteobacteria   | Gammaproteobacteria |                  |                       |                            |                      |
|                   |                     |            | Upper GI: GA (n paired = 13)                                    | Proteobacteria   | Gammaproteobacteria | Enterobacterales | Enterobacteriaceae    | NA                         | Escherichia/Shigella |
|                   |                     |            |                                                                 | Proteobacteria   | Betaproteobacteria  | Burkholderiales  | Burkholderiaceae      | Ralstonia                  |                      |
|                   |                     |            |                                                                 | Proteobacteria   | Gammaproteobacteria | Pseudomonadales  | Pseudomonadaceae      | Pseudomonas                |                      |
|                   |                     |            |                                                                 | Proteobacteria   | Gammaproteobacteria | Xanthomonadales  | Xanthomonadaceae      | Stenotrophomonas           |                      |
|                   |                     |            |                                                                 | Proteobacteria   | Gammaproteobacteria | Enterobacterales | Enterobacteriaceae    | Enterobacteriaceae unclass |                      |
|                   |                     |            |                                                                 | Proteobacteria   | Gammaproteobacteria |                  |                       |                            |                      |
|                   |                     |            | Upper GI: DD (n paired = 13)                                    | Proteobacteria   | Gammaproteobacteria | Enterobacterales | Enterobacteriaceae    | NA                         | Escherichia/Shigella |
|                   |                     |            |                                                                 | Actinobacteria   | Actinomycetia       | Micrococcales    | Microbacteriaceae     | Leucobacter                |                      |
|                   |                     |            |                                                                 | Proteobacteria   | Gammaproteobacteria | Pseudomonadales  | Pseudomonadaceae      | Pseudomonas                |                      |
|                   |                     |            | Lower GI: TI (n paired = 11)                                    | Firmicutes       | Clostridia          | Eubacteriales    | Peptostreptococcaceae | Peptostreptococcus         |                      |
|                   |                     |            | Lower GI: AO (n paired = 11)                                    | Firmicutes       | Clostridia          |                  |                       | Clostridia unclass.        |                      |
|                   |                     |            | Lower GI: SC (n paired = 11)                                    |                  |                     |                  |                       |                            |                      |
|                   |                     |            | Lower GI: AC (n paired = 12)                                    |                  |                     |                  |                       |                            |                      |
|                   |                     | Stool      | Stool (n paired = 8)                                            | Proteobacteria   | Betaproteobacteria  |                  |                       |                            |                      |
| Bosman,2019       | Healthy (female)    | Stool      |                                                                 |                  |                     |                  |                       |                            |                      |
| Cantarel, 2015    | Healthy+MS (female) | Stool      | Untreated MS vs HC or treated MS<br>Treated vs HC or treated MS | Firmicutes       | Clostridia          | Eubacteriales    | Oscillospiraceae      | Ruminococcus               |                      |
|                   |                     |            |                                                                 |                  |                     |                  |                       |                            |                      |
|                   | Healthy (female)    |            |                                                                 |                  |                     |                  |                       |                            |                      |
|                   | MS (female)         |            |                                                                 | Proteobacteria   | Gammaproteobacteria | Pseudomonadales  | Moraxellaceae         |                            |                      |
|                   |                     |            |                                                                 | Firmicutes       | Clostridia          | Eubacteriales    | Eubacteriaceae        | Eubacterium                |                      |
|                   | Firmicutes          | Clostridia | Eubacteriales                                                   | Oscillospiraceae | Ruminococcus        |                  |                       |                            |                      |
| Charoenngam, 2020 | Healthy             | Stool      |                                                                 | Firmicutes       | Clostridia          | Eubacteriales    | Oscillospiraceae      | Faecalibacterium           |                      |
|                   |                     |            |                                                                 | Firmicutes       | Clostridia          | Eubacteriales    | Ruminococcaceae       |                            |                      |
|                   |                     |            |                                                                 | Firmicutes       | Clostridia          |                  |                       |                            |                      |

PY = Publication Year; NA= Not Available; GI = gastrointestinal; GC = gastric corpus; GA = gastric antrum; DD = duodenum; TI = terminal ileum; AO = appendiceal orifice; AC = ascending colon; SC = sigmoid colon; MS = Multiple Sclerosis; HC = Healthy Controls; CD = Crohn disease; Q4 = upper quartile; Q1 = lower quartile.

**Table S2. Phylogenetic reconstruction of taxa that significantly decreased after vitamin D supplementation (Supplementation group)**

| Author, PY        | Health Status          | Sample       | Stratification                                            | Phylum         | Class                | Order              | Family              | Genus                      | Species |
|-------------------|------------------------|--------------|-----------------------------------------------------------|----------------|----------------------|--------------------|---------------------|----------------------------|---------|
| Ciubotaru, 2015   | Prediabetes (males)    | Stool        | 25(OH)D (Q4 vs Q1)                                        | Firmicutes     | Clostridia           | Eubacteriales      | Oscillospiraceae    | Ruminococcus               |         |
|                   |                        |              |                                                           | Firmicutes     | Clostridia           | Eubacteriales      | Lachnospiraceae     | Blautia                    |         |
|                   |                        |              |                                                           | Firmicutes     | Clostridia           | Eubacteriales      | Lachnospiraceae     | Roseburia                  |         |
|                   |                        |              |                                                           | Firmicutes     | Clostridia           | Eubacteriales      | Lachnospiraceae     |                            |         |
|                   |                        |              | Delta 25(OH)D (Q4 vs Q1)                                  | Firmicutes     | Clostridia           | Eubacteriales      | Oscillospiraceae    | Ruminococcus               |         |
|                   |                        |              |                                                           | Firmicutes     | Clostridia           | Eubacteriales      | Lachnospiraceae     | Blautia                    |         |
|                   |                        |              |                                                           | Firmicutes     | Clostridia           | Eubacteriales      | Lachnospiraceae     | Roseburia                  |         |
|                   |                        |              |                                                           | Firmicutes     | Clostridia           | Eubacteriales      | Lachnospiraceae     | Dorea                      |         |
|                   |                        |              |                                                           | Firmicutes     | Clostridia           | Eubacteriales      | Lachnospiraceae     |                            |         |
|                   |                        |              |                                                           | Firmicutes     | Clostridia           | Eubacteriales      | Lachnospiraceae     |                            |         |
| Drall, 2020       | Pregnancy (infants)    | Stool        | Infant vit D supplementation                              | Firmicutes     | Negativicutes        | Selenomonadales    | Selenomonadaceae    | Megamonas                  |         |
|                   |                        |              |                                                           | Firmicutes     | Negativicutes        | Veillonellales     | Veillonellaceae     |                            |         |
|                   |                        |              | Maternal prenatal or postnatal vit D suppl                | Proteobacteria | Deltaproteobacteria  | Desulfovibrionales | Desulfovibrionaceae | Bilophila (only breastfed) |         |
|                   |                        |              |                                                           | Firmicutes     | Clostridia           | Eubacteriales      | Lachnospiraceae     | Other (only breastfed)     |         |
| Garg, 2018        |                        | Stool        |                                                           |                |                      |                    |                     |                            |         |
| Hjelmsø, 2020     | Pregnancy              | Infant stool |                                                           |                |                      |                    |                     |                            |         |
| Kanhare, 2018     | Cystic fibrosis        | Stool        | Stool: vit D sufficient vs vit D insufficient at baseline | Proteobacteria | Gamma proteobacteria |                    |                     |                            |         |
|                   |                        | Stool        | Stool: change in microbiota after supplementation         | Firmicutes     | Clostridia           | Eubacteriales      | Oscillospiraceae    | Anaerotruncus              |         |
|                   |                        |              |                                                           | Firmicutes     | Negativicutes        | Veillonellales     | Veillonellaceae     | Veillonella                |         |
|                   |                        |              |                                                           | Firmicutes     | Clostridia           | Eubacteriales      | Clostridiaceae      |                            |         |
|                   |                        |              |                                                           | Firmicutes     | Erysipelotrichia     | Erysipelotrichales | Erysipelotrichaceae |                            |         |
| Missailidis, 2019 | HIV                    | Biopsy       |                                                           |                |                      |                    |                     |                            |         |
| Naderpoor, 2018   | Obesity                | Stool        | Vit D suppl. vs Placebo at follow-up                      | Firmicutes     | Clostridia           | Eubacteriales      | Lachnospiraceae     | Blautia                    |         |
|                   |                        |              | 25(OH)D>75 nmol/L vs 25(OH)D<50 nmol/L at follow-up       | Firmicutes     | Clostridia           | Eubacteriales      | Oscillospiraceae    | Ruminococcus               |         |
|                   |                        |              |                                                           | Firmicutes     | Clostridia           | Eubacteriales      | Clostridiaceae      |                            |         |
| Schaffler, 2018   | Crohn disease; Healthy | Stool        | CD: Week 4                                                |                |                      |                    |                     |                            |         |
|                   |                        |              | HC                                                        |                |                      |                    |                     |                            |         |
| Singh, 2020       | Healthy (female)       | Stool        | Main analysis                                             | Firmicutes     | Clostridia           | Eubacteriales      | Lachnospiraceae     | Roseburia                  |         |
|                   |                        |              |                                                           | Firmicutes     | Clostridia           | Eubacteriales      | Oscillospiraceae    | Ruminococcus               |         |
|                   |                        |              |                                                           | Firmicutes     | Clostridia           | Eubacteriales      | Oscillospiraceae    | Faecalibacterium           |         |
|                   |                        |              |                                                           | Bacteroidetes  | Bacteroidia          | Bacteroidales      | Prevotellaceae      | Prevotella                 |         |
|                   |                        |              |                                                           | Firmicutes     |                      |                    |                     |                            |         |

PY = Publication Year; NA= Not Available; 25(OH)D = 25 hydroxyvitamin D; HC = Healthy Controls; CD = Crohn Disease; Q4 = upper quartile; Q1 = lower quartile.

Table S3. Phylogenetic reconstruction of taxa that significantly decreased after vitamin D supplementation (Supplementation group)

| Author, PY            | Health Status                 | Sample | Stratification                                       | Phylum         | Class         | Order             | Family             | Genus           | Species              |
|-----------------------|-------------------------------|--------|------------------------------------------------------|----------------|---------------|-------------------|--------------------|-----------------|----------------------|
| Singh,2020            | Healthy (female)              | Stool  | Responders (>20 ng/ml) vs non-responders (<20 ng/ml) |                |               |                   |                    |                 |                      |
|                       |                               |        | Responders                                           | Firmicutes     |               |                   |                    |                 |                      |
|                       |                               |        | Non-responders                                       | Proteobacteria |               |                   |                    |                 |                      |
| Sordillo,2016         | Healthy                       | Stool  |                                                      | Firmicutes     | Bacilli       | Lactobacillales   | Streptococcaceae   | Lactococcus     |                      |
| Tabatabaeizadeh, 2019 | Healthy (female, adolescents) | Stool  |                                                      | Firmicutes     | Bacilli       | Lactobacillales   | Lactobacillaceae   | Lactobacillus   |                      |
|                       |                               |        |                                                      | Bacteroidetes  |               |                   |                    |                 |                      |
| Talsness, 2017        | Pregnancy (infants)           | Stool  | Vit D supplementation (none, <10mg, >=10mg)          | Actinobacteria | Actinomycetia | Bifidobacteriales | Bifidobacteriaceae | Bifidobacterium | Bifidobacterium sp   |
|                       |                               |        | 25(OH) levels (quintiles)                            | Actinobacteria | Actinomycetia | Bifidobacteriales | Bifidobacteriaceae | Bifidobacterium | Bifidobacterium sp   |
|                       |                               |        |                                                      | Bacteroidetes  | Bacteroidia   | Bacteroidales     | Bacteroidaceae     | Bacteroides     | Bacteroides fragilis |
|                       |                               |        | Infant vit D suppl. (yes vs no)                      |                |               |                   |                    |                 |                      |

PY = Publication Year; NA= Not Available; 25(OH)D = 25 hydroxyvitamin D; vit D = vitamin D.



**Table S4. Phylogenetic reconstruction of taxa that significantly increased after vitamin D supplementation (Supplementation group)**

| Author, PY        | Health Status                                   | Sample | Stratification                             | Phylum          | Class                 | Order              | Family             | Genus                        | Species |
|-------------------|-------------------------------------------------|--------|--------------------------------------------|-----------------|-----------------------|--------------------|--------------------|------------------------------|---------|
| Bashir, 2016      | Healthy                                         | Biopsy | Upper GI: GC (n paired = 13)               | Proteobacteria  | Alphaproteobacteria   | Hyphomicrobiales   | Bradyrhizobiaceae  | Bradyrhizobium               |         |
|                   |                                                 |        |                                            | Proteobacteria  | Epsilonproteobacteria | Campylobacterales  | Campylobacteraceae | Sulfurospirillum             |         |
|                   |                                                 |        |                                            | Actinobacteria  | Actinomycetia         | Actinomycetales    | Actinomycetaceae   | Actinomyces                  |         |
|                   |                                                 |        | Upper GI: GA (n paired = 13)               | Firmicutes      | Bacilli               | Lactobacillales    | Carnobacteriaceae  | Alkalibacterium              |         |
|                   |                                                 |        |                                            | Proteobacteria  | Alphaproteobacteria   | Hyphomicrobiales   | Bradyrhizobiaceae  | Bradyrhizobium               |         |
|                   |                                                 |        |                                            | Proteobacteria  | Alphaproteobacteria   |                    |                    |                              |         |
|                   |                                                 |        | Upper GI: DD (n paired = 13)               | Proteobacteria  | Alphaproteobacteria   | Hyphomicrobiales   | Bradyrhizobiaceae  | Bradyrhizobium               |         |
|                   |                                                 |        |                                            | Proteobacteria  | Betaproteobacteria    | Burkholderiales    | Oxalobacteraceae   | Janthinobacterium            |         |
|                   |                                                 |        |                                            | Proteobacteria  | Gammaproteobacteria   | Oceanospirillales  | Halomonadaceae     | Halomonas                    |         |
|                   |                                                 |        |                                            | Bacteroidetes   |                       |                    |                    | Bacteroidetes unclass.       |         |
|                   |                                                 |        | Lower GI: TI (n paired = 11)               | Firmicutes      | Clostridia            | Eubacteriales      | Lachnospiraceae    | Roseburia                    |         |
|                   |                                                 |        | Lower GI: AO (n paired = 11)               |                 |                       |                    |                    |                              |         |
|                   |                                                 |        | Lower GI: SC (n paired = 11)               |                 |                       |                    |                    |                              |         |
|                   |                                                 |        | Lower GI: AC (n paired = 12)               |                 |                       |                    |                    |                              |         |
|                   |                                                 | Stool  | Stool (n paired = 8)                       | Actinobacteria  | Actinomycetia         | Actinomycetales    | Actinomycetaceae   | Actinomyces                  |         |
| Bosman, 2019      | Healthy (female)                                | Stool  |                                            | Firmicutes      | Clostridia            | Eubacteriales      | Lachnospiraceae    | Lachnospira                  |         |
|                   |                                                 |        |                                            | Firmicutes      | Clostridia            | Eubacteriales      | Lachnospiraceae    | Fuscatenibacter              |         |
|                   |                                                 |        |                                            | Firmicutes      | Clostridia            | Eubacteriales      | Lachnospiraceae    |                              |         |
| Cantarel, 2015    | Healthy+MS (female)                             | Stool  |                                            | Firmicutes      | Clostridia            | Eubacteriales      | Oscillospiraceae   | Faecalibacterium             |         |
|                   |                                                 |        |                                            | Proteobacteria  | Gammaproteobacteria   | Enterobacterales   | Enterobacteriaceae |                              |         |
|                   | Healthy (female)<br>Multiple Sclerosis (female) |        | Untreated MS vs HC or treated MS           |                 |                       |                    |                    |                              |         |
|                   |                                                 |        |                                            | Verrucomicrobia | Verrucomicrobiae      | Verrucomicrobiales | Akkermansiaceae    | Akkermansia                  |         |
|                   |                                                 |        |                                            | Firmicutes      | Clostridia            | Eubacteriales      | Oscillospiraceae   | Faecalibacterium             |         |
|                   |                                                 |        |                                            | Firmicutes      | Clostridia            | Eubacteriales      | Lachnospiraceae    | Coprococcus                  |         |
|                   |                                                 |        |                                            | Proteobacteria  | Betaproteobacteria    | Burkholderiales    | Oxalobacteraceae   | Janthinobacterium            |         |
| Charoenngam, 2020 | Healthy                                         | Stool  |                                            | Bacteroidetes   | Bacteroidia           | Bacteroidales      | Bacteroidaceae     | Bacteroides                  |         |
|                   |                                                 |        |                                            | Bacteroidetes   | Bacteroidia           | Bacteroidales      | Tannerellaceae     | Parabacteroides              |         |
| Ciubotaru, 2015   | Prediabetes (males)                             | Stool  | 25(OH)D (Q4 vs Q1)                         |                 |                       |                    |                    |                              |         |
|                   |                                                 |        | Delta 25(OH)D (Q4 vs Q1)                   |                 |                       |                    |                    |                              |         |
| Drall, 2020       | Pregnancy (infants)                             | Stool  | Infant vit D suppl.                        |                 |                       |                    |                    |                              |         |
|                   |                                                 |        | Maternal prenatal or postnatal vit D suppl | Proteobacteria  | Gammaproteobacteria   | Pasteurellales     | Pasteurellaceae    | Haemophilus (only breastfed) |         |

PY = Publication Year; NA= Not Available; GI = gastrointestinal; GC = gastric corpus; GA = gastric antrum; DD = duodenum; TI = terminal ileum; AO = appendiceal orifice; AC = ascending colon; SC = sigmoid colon; MS = Multiple Sclerosis; HC = Healthy Controls; CD = Crohn disease; Q4 = upper quartile; Q1 = lower quartile.

**Table S5. Phylogenetic reconstruction of taxa that significantly increased after vitamin D supplementation (Supplementation group)**

| Author, PY        | Health Status          | Sample       | Stratification                                            | Phylum               | Class               | Order              | Family                    | Genus                        | Species                             |
|-------------------|------------------------|--------------|-----------------------------------------------------------|----------------------|---------------------|--------------------|---------------------------|------------------------------|-------------------------------------|
| Garg, 2018        |                        | Stool        |                                                           | Firmicutes           | Clostridia          | Eubacteriales      | Clostridiaceae            | Clostridium                  | <i>Clostridium colinae</i>          |
|                   |                        |              |                                                           | Proteobacteria       | Gammaproteobacteria | Enterobacterales   | <i>Enterobacteriaceae</i> |                              |                                     |
| Hjelmsø, 2020     | Pregnancy              | Infant stool |                                                           |                      |                     |                    |                           |                              |                                     |
| Kanhare, 2018     | Cystic fibrosis        | Stool        | Stool: vit D sufficient vs vit D insufficient at baseline | Bacteroidetes        | Bacteroidia         | Bacteroidales      | Bacteroidaceae            | <i>Bacteroides</i>           |                                     |
|                   |                        |              |                                                           | Bacteroidetes        | Bacteroidia         | Bacteroidales      | Tannerellaceae            | <i>Parabacteroides</i>       |                                     |
|                   |                        |              |                                                           | Bacteroidetes        | Bacteroidia         | Bacteroidales      | <i>Bacteroidaceae</i>     |                              |                                     |
|                   |                        |              |                                                           | Bacteroidetes        | Bacteroidia         | Bacteroidales      | <i>Porphyromonadaceae</i> |                              |                                     |
|                   |                        | Stool        | Stool: change in microbiota after suppl.                  | Firmicutes           | Bacilli             | Lactobacillales    | Streptococcaceae          | <i>Lactococcus</i>           |                                     |
|                   |                        |              |                                                           | Firmicutes           | Clostridia          | Eubacteriales      | Oscillospiraceae          | <i>Ruminococcus</i>          |                                     |
|                   |                        |              |                                                           | Firmicutes           | Negativicutes       | Acidaminococcales  | Acidaminococcaceae        | <i>Acidaminococcus</i>       |                                     |
|                   |                        |              |                                                           | Firmicutes           | Negativicutes       | Acidaminococcales  | Acidaminococcaceae        | <i>Phascolarctobacterium</i> |                                     |
|                   |                        |              |                                                           | Bacteroidetes        | Bacteroidia         | Bacteroidales      | <i>Odoribacteraceae</i>   |                              |                                     |
|                   |                        |              |                                                           | Bacteroidetes        | Bacteroidia         | Bacteroidales      | <i>Paraprevotellaceae</i> |                              |                                     |
| Missailidis, 2019 | HIV                    | Biopsy       |                                                           |                      |                     |                    |                           |                              |                                     |
| Naderpoor, 2018   | Obesity                | Stool        | Vit D suppl. vs Placebo at follow-up                      | Firmicutes           | Clostridia          | Eubacteriales      | Lachnospiraceae           | <i>Lachnospira</i>           |                                     |
|                   |                        |              | 25(OH)D>75 nmol/L vs 25(OH)D<50 nmol/L at follow-up       | Firmicutes           | Clostridia          | Eubacteriales      | Lachnospiraceae           | Coprococcus                  | <i>Coprococcus eutactus</i>         |
|                   |                        |              |                                                           | Firmicutes           | Clostridia          | Eubacteriales      | Lachnospiraceae           | <i>Coprococcus</i>           |                                     |
| Schaffler, 2018   | Crohn disease; Healthy | Stool        | CD: Week 4                                                | Firmicutes           | Bacilli             | Lactobacillales    | Lactobacillaceae          | <i>Lactobacillus</i>         |                                     |
|                   |                        |              |                                                           | Firmicutes           | Negativicutes       | Veillonellales     | Veillonellaceae           | <i>Megasphaera</i>           |                                     |
|                   |                        | HC           |                                                           |                      |                     |                    |                           |                              |                                     |
| Singh, 2020       | Healthy (female)       | Stool        | Main analysis                                             | Actinobacteria       | Actinomycetia       | Bifidobacteriales  | Bifidobacteriaceae        | <i>Bifidobacterium</i>       |                                     |
|                   |                        |              |                                                           | Verrucomicrobia      | Verrucomicrobiae    | Verrucomicrobiales | Akkermansiaceae           | <i>Akkermansia</i>           |                                     |
|                   |                        |              |                                                           | Bacteroidetes        | Bacteroidia         | Bacteroidales      | Bacteroidaceae            | <i>Bacteroides</i>           |                                     |
|                   |                        |              |                                                           | Bacteroidetes        | Bacteroidia         | Bacteroidales      | Rikenellaceae             | <i>Alistipes</i>             |                                     |
|                   |                        |              |                                                           | Bacteroidetes        | Bacteroidia         | Bacteroidales      | Tannerellaceae            | <i>Parabacteroides</i>       |                                     |
|                   |                        |              |                                                           | <i>Bacteroidetes</i> |                     |                    |                           |                              |                                     |
|                   |                        |              | Responders (>20 ng/ml) vs non-responders (<20 ng/ml)      | Bacteroidetes        | Bacteroidia         | Bacteroidales      | Bacteroidaceae            | <i>Bacteroides</i>           | <i>Bacteroides acidifaciens</i>     |
|                   |                        |              |                                                           | Firmicutes           | Clostridia          | Eubacteriales      | Oscillospiraceae          | <i>Ruminococcus</i>          | <i>Ruminococcus bromii</i>          |
|                   |                        |              |                                                           | Bacteroidetes        | Bacteroidia         | Bacteroidales      | Bacteroidaceae            | <i>Bacteroides</i>           | <i>Bacteroides eggertii</i>         |
|                   |                        |              |                                                           | Bacteroidetes        | Bacteroidia         | Bacteroidales      | Barnesiellaceae           | <i>Barnesiella</i>           | <i>Barnesiella intestinihominis</i> |

PY = Publication Year; 25(OH)D = 25 hydroxyvitamin D; HC = Healthy Controls; CD = Crohn Disease; vit D = vitamin D.

Table S6. Phylogenetic reconstruction of taxa that significantly increased after vitamin D supplementation (Supplementation group)

| Author, PY            | Health Status                 | Sample | Stratification                              | Phylum         | Class         | Order             | Family             | Genus           | Species                     |
|-----------------------|-------------------------------|--------|---------------------------------------------|----------------|---------------|-------------------|--------------------|-----------------|-----------------------------|
| Singh,2020            | Healthy (female)              | Stool  | Responders                                  | Bacteroidetes  |               |                   |                    |                 |                             |
|                       |                               |        |                                             | Actinobacteria |               |                   |                    |                 |                             |
|                       |                               |        |                                             | Proteobacteria |               |                   |                    |                 |                             |
|                       |                               |        |                                             | Lentisphaeraea |               |                   |                    |                 |                             |
|                       |                               |        | Non-responders                              | Firmicutes     | Clostridia    | Eubacteriales     | Lachnospiraceae    | Roseburia       | Roseburia faecis            |
|                       |                               |        |                                             | Bacteroidetes  | Bacteroidia   | Bacteroidales     | Bacteroidaceae     | Bacteroides     | Bacteroides eggerthii       |
|                       |                               |        |                                             | Bacteroidetes  | Bacteroidia   | Bacteroidales     | Prevotellaceae     | Prevotella      | Prevotella copri            |
|                       |                               |        |                                             | Firmicutes     | Clostridia    | Eubacteriales     | Oscillospiraceae   | Oscillospira    | Oscillospira guilliermondii |
|                       |                               |        |                                             | Bacteroidetes  | Bacteroidia   | Bacteroidales     | Rikenellaceae      | Alistipes       | Alistipes finegoldii        |
| Sordillo,2016         | Healthy                       | Stool  |                                             | Firmicutes     | Clostridia    | Eubacteriales     | Lachnospiraceae    | Lachnobacterium |                             |
| Tabatabaeizadeh, 2019 | Healthy (female, adolescents) | Stool  |                                             | Firmicutes     | Bacilli       | Lactobacillales   | Enterococcaceae    | Enterococcus    |                             |
|                       |                               |        |                                             | Actinobacteria | Actinomycetia | Bifidobacteriales | Bifidobacteriaceae | Bifidobacterium |                             |
|                       |                               |        |                                             | Firmicutes     |               |                   |                    |                 |                             |
| Talsness, 2017        | Pregnancy (infants)           | Stool  | Vit D supplementation (none, <10mg, >=10mg) |                |               |                   |                    |                 |                             |
|                       |                               |        | 25(OH) levels (quintiles)                   |                |               |                   |                    |                 |                             |
|                       |                               |        | Infant vit D suppl. (yes vs no)             |                |               |                   |                    |                 |                             |

PY = Publication Year; 25(OH)D = 25 hydroxyvitamin D; vit D = vitamin D.

**Table S7. Phylogenetic reconstruction of taxa that were significantly and negatively associated with either vitamin D serum concentrations or intake (Non-supplementation group)**

| Author, PY    | Health Status      | Vit D                                      | Sample                     | Stratification                  | Phylum         | Class               | Order             | Family             | Genus              | Species                    |
|---------------|--------------------|--------------------------------------------|----------------------------|---------------------------------|----------------|---------------------|-------------------|--------------------|--------------------|----------------------------|
| Kassem, 2020  | Pregnancy          | Prenatal maternal 25[OH]D and cord 25[OH]D | Stool                      | Prenatal maternal 25(OH)D       | Firmicutes     | Tissierellia        | Tissierellales    | Peptoniphilaceae   | Anaerococcus       |                            |
|               |                    |                                            |                            |                                 | Actinobacteria | Actinomycetia       | Bifidobacteriales | Bifidobacteriaceae | Bifidobacterium    |                            |
|               |                    |                                            |                            | Cord 25(OH)D                    | Firmicutes     | Clostridia          | Eubacteriales     | Lachnospiraceae    | Mediterraneibacter | Ruminococcus gnavus        |
| Luthold, 2017 | Healthy            | Dietary vit D intake                       | Stool                      | Dietary Vit D intake tertiles   | Firmicutes     | Negativicutes       | Veillonellales    | Veillonellaceae    | Veillonella        |                            |
|               |                    |                                            |                            |                                 | Proteobacteria | Gammaproteobacteria | Pasteurellales    | Pasteurellaceae    | Haemophilus        |                            |
| Luthold, 2017 | Healthy            | 25(OH)D                                    | Stool                      | 25(OH)D concentrations tertiles | Firmicutes     | Negativicutes       | Veillonellales    | Veillonellaceae    | Veillonella        |                            |
|               |                    |                                            |                            |                                 | Proteobacteria | Gammaproteobacteria | Pasteurellales    | Pasteurellaceae    | Haemophilus        |                            |
|               |                    |                                            |                            |                                 | Firmicutes     | Clostridia          | Eubacteriales     | Lachnospiraceae    | Coprococcus        |                            |
|               |                    |                                            |                            |                                 | Actinobacteria | Actinomycetia       | Bifidobacteriales | Bifidobacteriaceae | Bifidobacterium    |                            |
| Mandal, 2016  | Pregnancy          | Dietary vit D intake                       | Stool                      | Maternal microbiota             | Bacteroidetes  |                     |                   |                    |                    |                            |
| Seura, 2017   | Healthy (female)   | Dietary vit D intake                       | Stool                      |                                 |                |                     |                   |                    |                    |                            |
| Soltys, 2020  | Ulcerative Colitis | Serum Vit D levels                         | Stool                      | Stool                           |                |                     |                   |                    |                    |                            |
|               |                    |                                            | Biopsy                     | Biopsy: sigma inflamed          | Proteobacteria | Gammaproteobacteria | Pasteurellales    | Pasteurellaceae    | Haemophilus        | Haemophilus parainfluenzae |
|               |                    |                                            |                            |                                 | Firmicutes     | Bacilli             | Lactobacillales   | Streptococcaceae   | Streptococcus      |                            |
|               |                    |                                            |                            |                                 | Fusobacteria   | Fusobacteriia       | Fusobacteriales   | Fusobacteriaceae   | Fusobacterium      |                            |
|               |                    |                                            |                            |                                 | Firmicutes     | Bacilli             | Lactobacillales   | Streptococcaceae   |                    |                            |
|               |                    |                                            |                            |                                 | Proteobacteria | Gammaproteobacteria | Pasteurellales    | Pasteurellaceae    |                    |                            |
|               |                    |                                            |                            |                                 | Fusobacteria   | Fusobacteriia       | Fusobacteriales   | Fusobacteriaceae   |                    |                            |
|               |                    |                                            |                            |                                 | Proteobacteria | Gammaproteobacteria | Pasteurellales    |                    |                    |                            |
|               |                    |                                            |                            |                                 | Fusobacteria   | Fusobacteriia       | Fusobacteriales   |                    |                    |                            |
|               |                    |                                            |                            |                                 | Fusobacteria   |                     |                   |                    |                    |                            |
|               |                    |                                            |                            |                                 |                |                     |                   |                    |                    |                            |
|               |                    |                                            | Biopsy: sigma non-inflamed | Biopsy: sigma non-inflamed      | Actinobacteria | Coriobacteriia      | Coriobacteriales  | Coriobacteriaceae  | Collinsella        | Collinsella aerofaciens    |
|               |                    |                                            |                            |                                 | Fusobacteria   | Fusobacteriia       | Fusobacteriales   | Fusobacteriaceae   | Fusobacterium      |                            |
|               |                    |                                            |                            |                                 | Fusobacteria   | Fusobacteriia       | Fusobacteriales   | Fusobacteriaceae   |                    |                            |
|               |                    |                                            |                            |                                 | Fusobacteria   | Fusobacteriia       | Fusobacteriales   |                    |                    |                            |
|               |                    |                                            |                            |                                 | Actinobacteria |                     |                   |                    |                    |                            |
|               |                    |                                            |                            |                                 | Fusobacteria   |                     |                   |                    |                    |                            |

PY = Publication Year; 25(OH)D = 25 hydroxyvitamin D; vit D = vitamin D.

**Table S8. Phylogenetic reconstruction of taxa that were significantly and negatively associated with either vitamin D serum concentrations or intake (Non-supplementation group)**

| Author, PY   | Health Status                        | Vit D                                                                                                                                        | Sample | Stratification                      | Phylum         | Class             | Order             | Family             | Genus           | Species                             |
|--------------|--------------------------------------|----------------------------------------------------------------------------------------------------------------------------------------------|--------|-------------------------------------|----------------|-------------------|-------------------|--------------------|-----------------|-------------------------------------|
| Soltys, 2020 | Crohn disease                        | 25(OH)D                                                                                                                                      | Stool  | Stool                               |                |                   |                   |                    |                 |                                     |
|              |                                      |                                                                                                                                              | Biopsy | Biopsy: sigma inflamed              | Firmicutes     |                   |                   |                    |                 |                                     |
|              |                                      |                                                                                                                                              |        | Biopsy: sigma non-inflamed          |                |                   |                   |                    |                 |                                     |
|              |                                      |                                                                                                                                              |        | Biopsy: terminal ileum inflamed     |                |                   |                   |                    |                 |                                     |
|              |                                      |                                                                                                                                              |        | Biopsy: terminal ileum non-inflamed |                |                   |                   |                    |                 |                                     |
| Thomas, 2020 | Healthy (male, older)                | 25(OH)D; 1,25(OH) <sub>2</sub> D;<br>24,25(OH) <sub>2</sub> D; activation ratio<br>(1,25(OH) <sub>2</sub> D/25(OH)D) and<br>catabolism ratio | Stool  | 1,25(OH) <sub>2</sub> D             | Firmicutes     | Clostridia        | Eubacteriales     | Oscillospiraceae   | Oscillospira    |                                     |
|              |                                      |                                                                                                                                              |        |                                     | Firmicutes     | Clostridia        | Eubacteriales     | Lachnospiraceae    | Blautia         |                                     |
|              |                                      |                                                                                                                                              |        |                                     | Firmicutes     | Clostridia        | Eubacteriales     | Oscillospiraceae   | Anaerotruncus   |                                     |
|              |                                      |                                                                                                                                              |        |                                     | Firmicutes     | Clostridia        | Eubacteriales     | Oscillospiraceae   | Oscillospira    |                                     |
|              |                                      |                                                                                                                                              |        |                                     | Firmicutes     | Clostridia        | Eubacteriales     | Lachnospiraceae    | Blautia         |                                     |
| Weng, 2019   | Ulcerative Colitis; Healthy controls | Dietary vit D intake                                                                                                                         | Biopsy |                                     | Firmicutes     | Clostridia        | Eubacteriales     | Lachnospiraceae    | Dorea           |                                     |
|              |                                      |                                                                                                                                              |        |                                     | Firmicutes     | Clostridia        | Eubacteriales     | Oscillospiraceae   | Ruminococcus 2  |                                     |
|              | Crohn disease; Healthy controls      | Dietary vit D intake                                                                                                                         | Stool  |                                     | Firmicutes     | Clostridia        | Eubacteriales     | Clostridiaceae     | Clostridium     | Clostridium clostridioforme CAG:132 |
|              |                                      |                                                                                                                                              | Biopsy |                                     | Firmicutes     | Bacilli           | Lactobacillales   | Lactobacillaceae   | Lactobacillus   |                                     |
|              |                                      |                                                                                                                                              |        |                                     | Actinobacteria | Actinomycetia     | Micrococcales     | Intrasporangiaceae | Janibacter      |                                     |
|              |                                      |                                                                                                                                              |        |                                     | Proteobacteria | Hydrogenophilalia | Hydrogenophilales | Hydrogenophilaceae | Hydrogenophilus |                                     |
|              |                                      |                                                                                                                                              | Stool  |                                     |                |                   |                   |                    |                 |                                     |
| Wu, 2011     | Healthy                              | Dietary Vit D intakes                                                                                                                        | Stool  |                                     | Firmicutes     | Negativicutes     | Veillonellales    | Veillonellaceae    | Dialister       |                                     |

PY = Publication Year; 25(OH)D = 25 hydroxyvitamin D; 1,25(OH)<sub>2</sub>D = 1,25 hydroxyvitamin D<sub>2</sub>; 24,25(OH)<sub>2</sub>D = 24,25 hydroxyvitamin D<sub>2</sub>; vit D = vitamin D.

**Table S9. Phylogenetic reconstruction of taxa that were significantly and positively associated with either vitamin D serum concentrations or intake (Non-supplementation group)**

| Author, PY    | Health Status      | Vit D                                      | Sample       | Stratification                      | Phylum         | Class               | Order                 | Family                    | Genus                  | Species                            |
|---------------|--------------------|--------------------------------------------|--------------|-------------------------------------|----------------|---------------------|-----------------------|---------------------------|------------------------|------------------------------------|
| Kassem, 2020  | Pregnancy          | Prenatal maternal 25(OH)D and cord 25(OH)D | Stool        | Prenatal maternal 25(OH)D           | Firmicutes     | Clostridia          | Eubacteriales         | Lachnospiraceae           | Mediterraneibacter     | <i>Ruminococcus gnavus</i>         |
|               |                    |                                            |              |                                     | Proteobacteria | Gammaproteobacteria | Pseudomonadales       | Moraxellaceae             | <i>Acinetobacter</i>   |                                    |
|               |                    |                                            |              |                                     | Actinobacteria | Actinomycetia       | Corynebacteriales     | Corynebacteriaceae        | <i>Corynebacterium</i> |                                    |
|               |                    |                                            |              |                                     | Firmicutes     | Clostridia          | Eubacteriales         | <i>Clostridiaceae</i>     |                        |                                    |
|               |                    |                                            | Cord 25(OH)D |                                     | Proteobacteria | Gammaproteobacteria | Pseudomonadales       | Moraxellaceae             | <i>Acinetobacter</i>   | <i>Acinetobacter rhizosphaerae</i> |
|               |                    |                                            |              |                                     | Proteobacteria | Gammaproteobacteria | Pseudomonadales       | Moraxellaceae             | <i>Acinetobacter</i>   |                                    |
|               |                    |                                            |              |                                     | Firmicutes     | Erysipelotrichia    | Erysipelotrichales    | Erysipelotrichaceae       | <i>Bulleidia</i>       |                                    |
|               |                    |                                            |              |                                     | Actinobacteria | Actinomycetia       | Corynebacteriales     | Corynebacteriaceae        | <i>Corynebacterium</i> |                                    |
|               |                    |                                            |              |                                     | Firmicutes     | Tissierellia        | Tissierellales        | Peptoniphilaceae          | <i>Finegoldia</i>      |                                    |
|               |                    |                                            |              |                                     | Firmicutes     | Tissierellia        | Tissierellales        | Peptoniphilaceae          | <i>Peptoniphilus</i>   |                                    |
|               |                    |                                            |              |                                     | Firmicutes     | Bacilli             | Lactobacillales       | Streptococcaceae          | <i>Streptococcus</i>   |                                    |
|               |                    |                                            |              |                                     | Firmicutes     | Clostridia          | Eubacteriales         | <i>Clostridiaceae</i>     |                        |                                    |
|               |                    |                                            |              |                                     | Proteobacteria | Gammaproteobacteria | Enterobacterales      | <i>Enterobacteriaceae</i> |                        |                                    |
| Luthold, 2017 | Healthy            | Dietary vit D intake                       | Stool        | Dietary Vit D intake tertiles       | Bacteroidetes  | Bacteroidia         | Bacteroidales         | Prevotellaceae            | <i>Prevotella</i>      |                                    |
| Luthold, 2017 | Healthy            | 25(OH)D                                    | Stool        | 25(OH)D concentrations tertiles     | Firmicutes     | Negativicutes       | Veillonellales        | Veillonellaceae           | <i>Megasphaera</i>     |                                    |
| Mandal, 2016  | Pregnancy          | Dietary vit D intake                       | Stool        | Maternal microbiota                 | Firmicutes     | Bacilli             | Bacillales            | Staphylococcaceae         | <i>Staphylococcus</i>  |                                    |
| Seura, 2017   | Healthy (female)   | Dietary vit D intake                       | Stool/Biopsy |                                     |                |                     |                       |                           |                        |                                    |
| Soltys, 2020  | Ulcerative Colitis | 25(OH)D                                    | Stool        | Stool                               |                |                     |                       |                           |                        |                                    |
|               |                    |                                            | Biopsy       | Biopsy: sigma inflamed              |                |                     |                       |                           |                        |                                    |
|               |                    |                                            |              | Biopsy: sigma non-inflamed          |                |                     |                       |                           |                        |                                    |
| Soltys, 2020  | Crohn disease      | 25(OH)D                                    | Stool        | Stool                               | Proteobacteria | Gammaproteobacteria | Pasteurellales        | Pasteurellaceae           | <i>Haemophilus</i>     |                                    |
|               |                    |                                            |              |                                     | Proteobacteria | Gammaproteobacteria | Pasteurellales        | <i>Pasteurellaceae</i>    |                        |                                    |
|               |                    |                                            |              |                                     | Proteobacteria | Gammaproteobacteria | <i>Pasteurellales</i> |                           |                        |                                    |
|               |                    |                                            | Biopsy       | Biopsy: sigma inflamed              |                |                     |                       |                           |                        |                                    |
|               |                    |                                            |              | Biopsy: sigma non-inflamed          |                |                     |                       |                           |                        |                                    |
|               |                    |                                            |              | Biopsy: terminal ileum inflamed     |                |                     |                       |                           |                        |                                    |
|               |                    |                                            |              | Biopsy: terminal ileum non-inflamed |                |                     |                       |                           |                        |                                    |

PY = Publication Year; 25(OH)D = 25 hydroxyvitamin D; vit D = vitamin D intake.

**Table S10. Phylogenetic reconstruction of taxa that were significantly and positively associated with either vitamin D serum concentrations or intake (Non-supplementation group)**

| Author, PY   | Health Status                           | Vit D                                                                                                 | Sample | Stratification   | Phylum         | Class               | Order              | Family                                       | Genus                          | Species           |
|--------------|-----------------------------------------|-------------------------------------------------------------------------------------------------------|--------|------------------|----------------|---------------------|--------------------|----------------------------------------------|--------------------------------|-------------------|
| Thomas, 2020 | Healthy (male, older)                   | 25(OH)D; 1,25(OH)2D;<br>24,25(OH)2D; activation ratio<br>(1,25(OH)2D/25(OH)D) and<br>catabolism ratio | Stool  | 1,25(OH)2D       | Firmicutes     | Clostridia          | Eubacteriales      | Lachnospiraceae                              | Coprococcus                    | Coprococcus catus |
|              |                                         |                                                                                                       |        |                  | Firmicutes     | Clostridia          | Eubacteriales      | Lachnospiraceae                              | Blautia                        | Blautia Obeum     |
|              |                                         |                                                                                                       |        | Activation ratio | Firmicutes     | Clostridia          | Eubacteriales      | Eubacteriales Family<br>XIII. Incertae Sedis | Mogibacterium                  |                   |
|              |                                         |                                                                                                       |        |                  | Firmicutes     | Clostridia          | Eubacteriales      | Lachnospiraceae                              | Coprococcus                    |                   |
|              |                                         |                                                                                                       |        |                  | Firmicutes     | Clostridia          | Eubacteriales      | Ruminococcaceae                              |                                |                   |
|              |                                         |                                                                                                       |        |                  | Firmicutes     | Clostridia          | Eubacteriales      | Lachnospiraceae                              |                                |                   |
|              |                                         |                                                                                                       |        |                  | Lentisphaerae  | Lentisphaeria       | Victivallales      | Victivallaceae                               |                                |                   |
|              |                                         |                                                                                                       |        |                  | Firmicutes     | Clostridia          | Eubacteriales      |                                              |                                |                   |
| Weng, 2019   | Ulcerative Colitis; Healthy<br>controls | Dietary vit D intake                                                                                  | Biopsy |                  | Proteobacteria | Deltaproteobacteria | Desulfovibrionales | Desulfovibrionaceae                          | Bilophila                      |                   |
|              |                                         |                                                                                                       | Stool  |                  | Proteobacteria | Deltaproteobacteria | Desulfovibrionales | Desulfovibrionaceae                          | Desulfovibrio                  |                   |
|              |                                         |                                                                                                       |        |                  | Bacteroidetes  | Bacteroidia         | Bacteroidales      | Barnesiellaceae                              | Barnesiella                    |                   |
|              | Crohn disease; Healthy<br>controls      | Dietary vit D intake                                                                                  | Biopsy |                  | Firmicutes     | Clostridia          | Eubacteriales      | Lachnospiraceae                              | Fusicatenibacter               |                   |
|              |                                         |                                                                                                       |        |                  | Firmicutes     | Clostridia          | Eubacteriales      | Lachnospiraceae                              | Blautia                        |                   |
|              |                                         |                                                                                                       |        |                  | Firmicutes     | Clostridia          | Eubacteriales      | Lachnospiraceae                              | Lachnospiraceae incertae sedis |                   |
|              |                                         |                                                                                                       | Stool  |                  | Firmicutes     | Clostridia          | Eubacteriales      | Oscillospiraceae                             | Ruminococcus                   |                   |
|              |                                         |                                                                                                       |        |                  | Firmicutes     | Clostridia          | Eubacteriales      | Lachnospiraceae                              | Fusicatenibacter               |                   |
|              |                                         |                                                                                                       |        |                  | Proteobacteria | Oligoflexia         | Bdellovibrionales  | Bdellovibrionaceae                           | Bdellovibrio                   |                   |
|              |                                         |                                                                                                       |        |                  | Bacteroidetes  | Bacteroidia         | Bacteroidales      | Barnesiellaceae                              | Barnesiella                    |                   |
| Wu, 2011     | Healthy                                 | Dietary Vit D intakes                                                                                 | Stool  |                  | Bacteroidetes  | Bacteroidia         | Bacteroidales      | Bacteroidaceae                               | Bacteroides                    |                   |

PY = Publication Year; 25(OH)D = 25 hydroxyvitamin D; 1,25(OH)<sub>2</sub>D = 1,25 hydroxyvitamin D<sub>2</sub>; 24,25(OH)<sub>2</sub>D = 24,25 hydroxyvitamin D<sub>2</sub>; vit D = vitamin D.
